# Supplementary material for: Guselkumab, an inhibitor of the IL-23p19 subunit, provides sustained improvement in signs and symptoms of active psoriatic arthritis: 1 year results of a phase III randomised study of patients who were biologic-naïve or TNFα inhibitor-experienced
Source: HighWire-hosted journal article supplement (doi:10.1136/rmdopen-2020-001457), 2021-02-01
Supplement: rmdopen-2020-001457supp002_data_supplement.pdf [file rmdopen-2020-001457supp002_data_supplement.pdf]

**A. ACR 20 (NRI)**

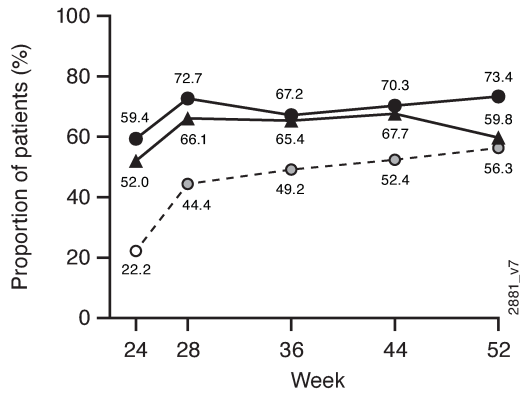

GUS Q4W, n = 128  
 GUS Q8W, n = 127  
 PBO to GUS Q4W, n = 126

**B. ACR 20 (Observed)**

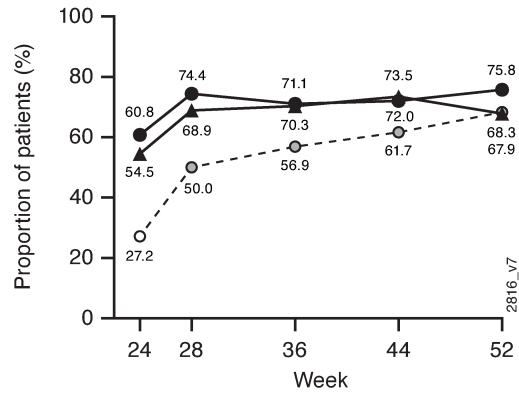

GUS Q4W 125 125 121 125 124  
 GUS Q8W 123 122 118 117 112  
 PBO to GUS Q4W 114 112 109 107 104

**C. ACR 50 (NRI)**

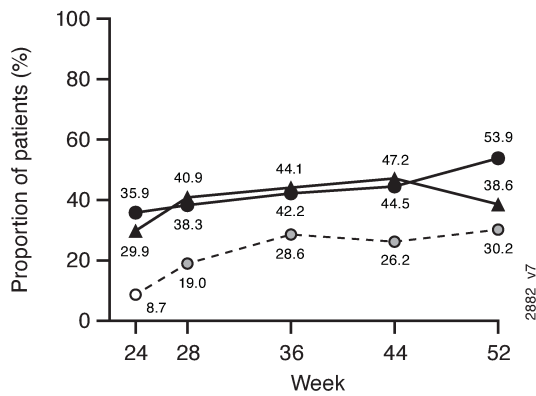

GUS Q4W, n = 128  
 GUS Q8W, n = 127  
 PBO to GUS Q4W, n = 126

**D. ACR 50 (Observed)**

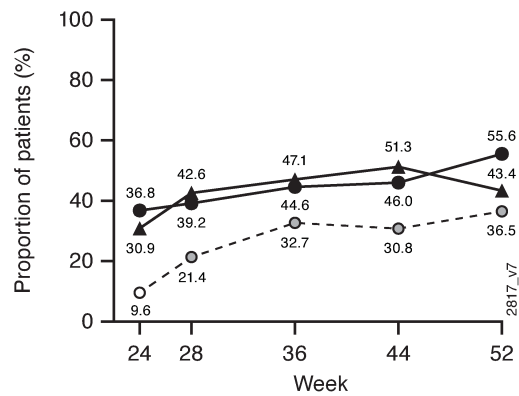

GUS Q4W 125 125 121 124 124  
 GUS Q8W 123 122 119 117 113  
 PBO to GUS Q4W 114 112 110 107 104

**E. ACR 70 (NRI)**

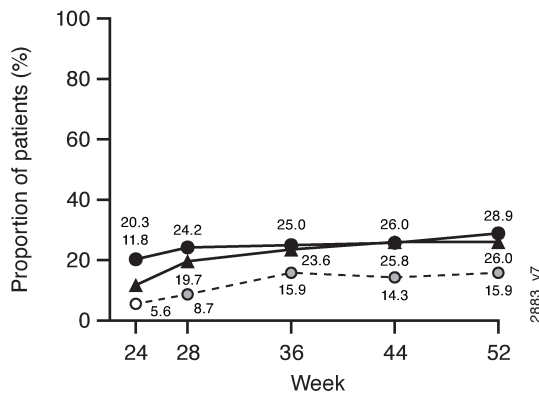

GUS Q4W, n = 128  
 GUS Q8W, n = 127  
 PBO to GUS Q4W, n = 126

**F. ACR 70 (Observed)**

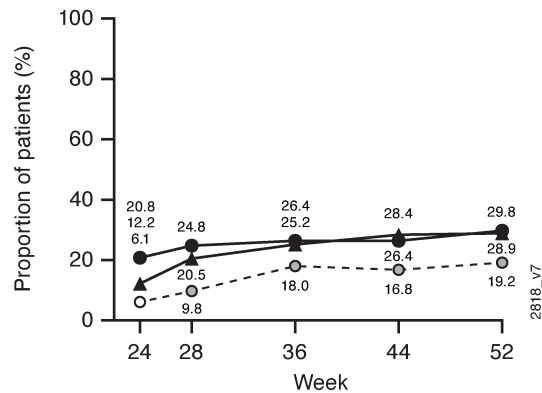

GUS Q4W 125 125 121 125 124  
 GUS Q8W 123 122 119 116 114  
 PBO to GUS Q4W 114 112 111 107 104

● GUS 100 mg Q4W    ▲ GUS 100 mg Q8W    - - ○ - - PBO to    - - ○ - - GUS 100 mg Q4W
